# Supplementary material for: Scorpionfish BPI is highly active against multiple drug-resistant Pseudomonas aeruginosa isolates from people with cystic fibrosis
Source: eLife journal article supplement (doi:10.7554/elife.86369), 2023-06-09
Supplement: fig2-data1 [file Figure 2 source data.xlsx]

## Sheet: Figure 2B
Control	CF
11.6	112
169	49.5
82.6	159
127	109
221	96.8
55.5	19.8
45.4	70.7
130	46.6
62.8	95.4
168	98
92.5	178
45.4	68.2
6.1	30.2
73.5	170
162	126
77.3	45
35.8	82.5
155	183
37.2	57
56	78.9
56.3	126
37.2	24.7
25.4	21.6
55	40.3
95.5	59.4
125	61.2
69	123
43.3	40.2
114	60.9
9	122
96	110
34.3	21.1
17.5	112
26.5	217
27.7	6
34.4	98.5
68.6	26.9
100	38.7
13.3	129

## Sheet: Figure 2C
Control	CF
259	7373
88	572
184	1292
699	1464
195	3529
109	1126
145	346
112	292
60	534
278	1681
167	3514
37	8013
77	142
660	512
156	139
432	89
33	3529
67	512
176	4386
360	12181
17	9149
172	819
331	1351
323	1230
146	7812
81	96
308	1867
576	93
832	271
1365	546
232	645
126	1808
367	433
272	31
784	4148
163	284
1359	2109
511	2388
20	211

## Sheet: Figure 2E
huBPI	muBPI	scoBPI	osBPI
7373	11	28	37
572	26	57	60
1292	14	23	17
1464	17	23	18
3529	13	19	1012
1126	10	42	68
346	11	26	27
292	89	23	112
534	7	12	12
1681	15	25	53
3514	96	17	31
8013	11	24	42
142	15	17	25
512	23	5	28
139	8	18	11
89	7	12	14
3529	7	14	12
512	9	16	63
4386	9	21	84
12181	11	14	20
9149	11	20	37
819	9	16	60
1351	10	26	68
1230	21	21	50
7812	23	43	72
96	19	21	14
1867	10	23	39
93	10	12	40
271	22	29	64
546	5	11	11
645	5	11	9
1808	18	18	28
433	8	22	56
31	442	154	726
4148	30	29	37
284	9	18	16
2109	8	26	19
2388	18	13	292
211	11	30	37
