# Supplementary material for: Scorpionfish BPI is highly active against multiple drug-resistant Pseudomonas aeruginosa isolates from people with cystic fibrosis
Source: eLife journal article supplement (doi:10.7554/elife.86369), 2023-06-09
Supplement: fig2-figsupp1-data1 [file Figure 2-figure supplement 1 source data.xlsx]

## Sheet: Figure 2-figure supplement 1D
huBPI	muBPI	scoBPI	osBPI
9768	10399	7906	8179
