# Supplementary material for: Scorpionfish BPI is highly active against multiple drug-resistant Pseudomonas aeruginosa isolates from people with cystic fibrosis
Source: eLife journal article supplement (doi:10.7554/elife.86369), 2023-06-09
Supplement: fig3-data1 [file Figure 3 source data.xlsx]

## Sheet: Figure 3A
NT (ng/ml)	huBPI (ng/ml)	muBPI (ng/ml)	scoBPI (ng/ml)	osBPI (ng/ml)
8.752	0.172	1.15	0.0194	4.88
10.6	0.156	1.21	0.0625	3.95
3.11	0.101	1.58	0.0118	2.86
3.44	0.185	3.62	0.0677	6.29

## Sheet: Figure 3B
NT (ng/ml)	huBPI 5 nM (%)	huBPI 1 nM (%)	huBPI 0.2 nM (%)	huBPI 0.04 nM (%)	scoBPI 5 nM (%)	scoBPI 1 nM (%)	scoBPI 0.2 nM (%)	scoBPI 0.04 nM (%)
17	23.8235	53.6471	55	84.1176	1.7	3.42941	19.6471	40.6471
5.535	4.17344	6.53117	10.3252	72.3577	0.196929	0.363144	1.1635	33.8753
18.56	4.25862	6.66379	10.2586	33.2759	0.162931	0.405172	1.28448	3.99138
8.31	4.87365	9.16968	12.154	30.9266	0.243081	0.330927	0.859206	4.81348
NT (pg/ml)	huBPI 5 nM (pg/ml)	huBPI 1 nM (pg/ml)	huBPI 0.2 nM (pg/ml)	huBPI 0.04 nM (pg/ml)	scoBPI 5 nM (pg/ml)	scoBPI 1 (pg/ml)	scoBPI 0.2 nM (pg/ml)	scoBPI 0.04 nM (pg/ml)
17000	4050	9120	9350	14300	289	583	3340	6910
5535	247.5	361.5	571.5	4005	10.9	20.1	66.6	1875
18560	790.4	1236.8	1904	6176	30.24	75.2	238.4	740.8
8310	405	762	1010	2570	20.2	27.5	71.4	400

## Sheet: Figure 3C
huBPI (nm)		scoBPI (nm)		LPS (nm)		huBPI + LPS (nm)		scoBPI + LPS (nm)
3.76	3.72	3.82	3.81	66.45	68.58	132.41	133.18	159.21	146.94
3.82	3.8	3.74	3.71	66.98	66.31	134.38	135.24	151.16	145.33

## Sheet: Figure 3D
NT (ng/ml)	huBPI 0.32 nM (%)	huBPI 0.16 nM (%)	huBPI 0.08 nM (%)	huBPI 0.04 nM (%)	scoBPI 0.32 nM (%)	scoBPI 0.16 nM (%)	scoBPI 0.08 nM (%)	scoBPI 0.04 nM (%)
3.52	0.491477	0.75	1.07386	2.44602	0.221591	0.332386	0.244318	0.366477
31.4	2.36624	3.40764	6.78344	11.2739	1.58917	1.40446	1.59873	1.58599
41.8	0.65311	1.01675	1.64354	4.689	0.41866	0.41866	0.574163	0.38756
NT (pg/ml)	huBPI 0.32 nM (pg/ml)	huBPI 0.16 nM (pg/ml)	huBPI 0.08 nM (pg/ml)	huBPI 0.04 nM (pg/ml)	scoBPI 0.32 nM (pg/ml)	scoBPI 0.16 nM (pg/ml)	scoBPI 0.08 nM (pg/ml)	scoBPI 0.04 nM (pg/ml)
3520	17.3	26.4	37.8	86.1	7.8	11.7	8.6	12.9
31400	743	1070	2130	3540	499	441	502	498
41800	273	425	687	1960	175	175	240	162

## Sheet: Figure 3E
NT (ng/ml)	huBPI 0.32 nM (%)	huBPI 0.16 nM (%)	huBPI 0.08 nM (%)	huBPI 0.04 nM (%)	scoBPI 0.32 nM (%)	scoBPI 0.16 nM (%)	scoBPI 0.08 nM (%)	scoBPI 0.04 nM (%)
4.76	6.80672	9.43277	13.0672	18.4874	5.93487	6.80672	5.93487	6.80672
18	7.72222	12.2222	12.7222	17.1111	6.83333	6.94444	6.38889	7.5
15.7	5.11465	7.13376	6.75159	10.6369	5.84713	5.5414	6.2293	5.74522
NT (ng/ml)	huBPI 0.32 nM (pg/ml)	huBPI 0.16 nM (pg/ml)	huBPI 0.08 nM (pg/ml)	huBPI 0.04 nM (pg/ml)	scoBPI 0.32 nM (pg/ml)	scoBPI 0.16 nM (pg/ml)	scoBPI 0.08 nM (pg/ml)	scoBPI 0.04 nM (pg/ml)
4760	324	449	622	880	282.5	324	282.5	324
18000	1390	2200	2290	3080	1230	1250	1150	1350
15700	803	1120	1060	1670	918	870	978	902
