# Supplementary material for: Scorpionfish BPI is highly active against multiple drug-resistant Pseudomonas aeruginosa isolates from people with cystic fibrosis
Source: eLife journal article supplement (doi:10.7554/elife.86369), 2023-06-09
Supplement: fig4-data1 [file Figure 4 source data.xlsx]

## Sheet: Figure 4A
huBPI		muBPI		scoBPI		osBPI
BPI (nM, log10)	CFU %	BPI (nM, log10)	CFU %	BPI (nM, log10)	CFU %	BPI (nM, log10)	CFU %
0.301	0	1.003	0	-0.301	0	2.7	0
-0.398	0	0.304	2	-1	0	2	10
-1.097	0	-0.395	16	-1.7	79	1.3	96
-1.796	44	-1.093	47	-2.4	58	0.6	111
-2.495	100	-1.792	95	-3.1	107	-0.097	130
0.301	0	1.003	0	-0.301	0	2.7	1
-0.398	0	0.304	3	-1	7	2	16
-1.097	1	-0.395	10	-1.7	46	1.3	60
-1.796	96	-1.093	47	-2.4	67	0.6	81
-2.495	106	-1.792	93	-3.1	86	-0.097	77
0.301	0	1.003	5	-0.301	0	2.16	1
-0.398	0	0.304	7	-1	10	1.46	56
-1.097	21	-0.395	13	-1.7	68	0.763	103
-1.796	75	-1.093	63	-2.4	80	0.064	95
-2.495	79	-1.792	107	-3.1	83	-0.63	94
huBPI		muBPI		scoBPI		osBPI
BPI (nM, log10)	CFU	BPI (nM, log10)	CFU	BPI (nM, log10)	CFU	BPI (nM, log10)	CFU
0.301	0	1.003	0.5	-0.301	0	2.7	0
-0.398	0	0.304	3	-1	0	2	25.5
-1.097	0	-0.395	28	-1.7	216	1.3	244.5
-1.796	78.5	-1.093	84.5	-2.4	160	0.6	283
-2.495	180	-1.792	171	-3.1	292	-0.097	329
0.301	0	1.003	1	-0.301	0.5	2.7	2
-0.398	0.5	0.304	7	-1	18.5	2	48
-1.097	2	-0.395	20.5	-1.7	130	1.3	174.5
-1.796	208.5	-1.093	100.5	-2.4	190	0.6	236
-2.495	230	-1.792	200	-3.1	244	-0.097	224
0.301	0	1.003	10	-0.301	0	2.16	1.5
-0.398	0.5	0.304	15	-1	13	1.46	71.5
-1.097	82	-0.395	26	-1.7	86	0.763	132.5
-1.796	300	-1.093	126.5	-2.4	101	0.064	122
-2.495	315	-1.792	216	-3.1	106	-0.63	120.5

## Sheet: Figure 4B
NT (CFU %)	huBPI (CFU %)	muBPI (CFU %)	scoBPI (CFU %)	osBPI (CFU %)
100	1	80	1	85
100	0	21	0	97
100	0	102	2	148
NT (CFU )	huBPI (CFU )	muBPI (CFU)	scoBPI (CFU)	osBPI (CFU)
166	1	132	1	141
196	0	41	0	190
314	1	320	5	464

## Sheet: FIgure 4C
huBPI	BPI (nM)	Isolate 1 CFU %				Isolate 2 CFU %		Isolate 3 CFU %		Isolate 4 CFU %		Isolate 5 CFU %		Isolate 6 CFU %
	0	100	100	100	100	100	100	100	100	100	100	100	100	100	100
	20	23	2	11	1	49	61	96	90	0	0	103	108	0	0
	500	5	1	1	0	39	26	65	59	0	0	63	88	0	0
scoBPI	BPI (nM)	Isolate 1 CFU %				Isolate 2 CFU %		Isolate 3 CFU %		Isolate 4 CFU %		Isolate 5 CFU %		Isolate 6 CFU %
	0	100	100	100	100	100	100	100	100	100	100	100	100	100	100
	20	33	5	6	3	75	43	83	109	111	0	110	91	2	0
	500	0	0	0	2	7	20	37	33	0	0	53	29	0	0
		Isolate 1 CFU				Isolate 2 CFU		Isolate 3 CFU		Isolate 4 CFU		Isolate 5 CFU		Isolate 6 CFU
huBPI	BPI (nM)
	0	400	200	500	180	320	920	332	664	180	256	310	548	192	380
	20	93	3	57	1	156	560	320	600	0	0	320	592	0	0
	500	20	1	5	0	124	240	216	392	0	0	194	484	0	0
scoBPI	BPI (nM)
	0	400	200	500	180	320	920	332	664	180	256	310	548	192	380
	20	130	9	31	6	240	400	276	728	200	0	340	500	0	0
	500	1	0	0	3	22	184	123	224	0	0	163	160	0	0
