# Supplementary material for: Scorpionfish BPI is highly active against multiple drug-resistant Pseudomonas aeruginosa isolates from people with cystic fibrosis
Source: eLife journal article supplement (doi:10.7554/elife.86369), 2023-06-09
Supplement: fig4-figsupp1-data1 [file Figure 4-figure supplement 1-source data.xlsx]

## Sheet: FIgure 4-figure supplement 1A,B
		Isolate 1 CFU				Isolate 2 CFU		Isolate 3 CFU		Isolate 4 CFU		Isolate 5 CFU		Isolate 6 CFU
huBPI	BPI (nM)
	0	400	200	500	180	320	920	332	664	180	256	310	548	192	380
	20	93	3	57	1	156	560	320	600	0	0	320	592	0	0
	500	20	1	5	0	124	240	216	392	0	0	194	484	0	0
scoBPI	BPI (nM)
	0	400	200	500	180	320	920	332	664	180	256	310	548	192	380
	20	130	9	31	6	240	400	276	728	200	0	340	500	0	0
	500	1	0	0	3	22	184	123	224	0	0	163	160	0	0
