# Supplementary material for: Scorpionfish BPI is highly active against multiple drug-resistant Pseudomonas aeruginosa isolates from people with cystic fibrosis
Source: eLife. 2023 Jul 18;12:e86369. doi: 10.7554/eLife.86369 (PMC10353861; doi:10.7554/eLife.86369)
Supplement: Figure 1—figure supplement 2—source data 1. — Raw data for Figure 2—figure supplement 1D. [file elife-86369-fig1-figsupp2-data1.xlsx]

## Sheet: Figure 1-figure supplement 2
Abbreviation	Identity to scoBPI (%)	Identity to huBPI (%)
gaBPI	62.8	35.3
acBPI	56.4	37
leBPI	65.6	38.9
icBPI	69.6	37.4
saBPI1	74.7	37.9
saBPI2	75.6	35.6
cyBPI	78	37.4
sciBPI	80.8	36.3
paBPI	81.9	37.6
